# Supplementary material
Source: PubMed Central journal article supplement (PMC6404556)
Supplement: fj.201800636R.sf1.pdf [file fj.201800636R.sf1.pdf]

## Supplemental Figure 1. MHC (*H2*) and *B2M* Genetic Loci in NSG Strains

|                                                                                          | <u>Chromosome 2</u> | <u>Chromosome 17</u> |           |           |           |           |          |          |  |
|------------------------------------------------------------------------------------------|---------------------|----------------------|-----------|-----------|-----------|-----------|----------|----------|--|
|                                                                                          | <i>β2M</i>          | <i>K</i>             | <i>Ab</i> | <i>Aa</i> | <i>Eb</i> | <i>Ea</i> | <i>D</i> | <i>L</i> |  |
| C57BL/6                                                                                  | +                   | b                    | b         | b         | b*        | -         | b        | -        |  |
| NOD                                                                                      | +                   | d                    | g7        | b         | d*        | -         | b        | -        |  |
| NSG                                                                                      | +                   | d                    | g7        | b         | d*        | -         | b        | -        |  |
| NSG- <i>B2M</i> <sup>null</sup>                                                          | -                   | d*                   | g7        | b         | d*        | -         | b        | -        |  |
| NSG-( <i>K<sup>b</sup> D<sup>b</sup></i> ) <sup>null</sup>                               | +                   | -                    | b*        | b         | b*        | -         | -        | -        |  |
| NSG-( <i>IA</i> <sup>null</sup> )                                                        | +                   | b*                   | -         | b         | b*        | -         | b        | -        |  |
| NSG-( <i>IA IE</i> ) <sup>null</sup>                                                     | +                   | b*                   | -         | -         | -         | -         | b        | -        |  |
| NSG- <i>B2M</i> <sup>null</sup> ( <i>IA IE</i> ) <sup>null</sup>                         | -                   | b*                   | -         | -         | -         | -         | b*       | -        |  |
| NSG-( <i>K<sup>b</sup> D<sup>b</sup></i> ) <sup>null</sup> ( <i>IA</i> <sup>null</sup> ) | +                   | -                    | -         | b*        | b*        | -         | -        | -        |  |

A schematic showing the expression pattern of *B2M* and the *H2* haplotypes for the relevant MHC class I and II in the various mouse strains used.

\* Protein not expressed on cell surface. Genes were originally targeted in *H2<sup>b</sup>* haplotype strains (C57BL/6 or 129). The tightly linked MHC alleles were carried with the targeted alleles in the backcrosses to NSG.
